# Supplementary figures and images for: Do economic recessions during early and mid-adulthood influence cognitive function in older age?
Source: HighWire-hosted journal article supplement (doi:10.1136/jech-2013-202843), 2013-11-20

### Switzerland

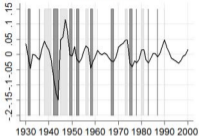

### Spain

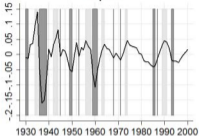

### Denmark

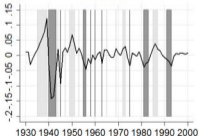

### Germany

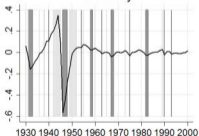

Recession Boom

Supplement: jech-2013-202843supp_figure.pdf [file jech-2013-202843supp_figure.pdf]
